# Supplementary material for: The Inflammation-Based Glasgow Prognostic Score as a Prognostic Factor in Patients with Intensive Cardiovascular Care Unit
Source: PubMed Central journal article supplement (PMC6572028; doi:10.3390/medicina55050139), 2019-05-15
Supplement: medicina-55-00139-s001.pdf [file medicina-55-00139-s001.pdf]

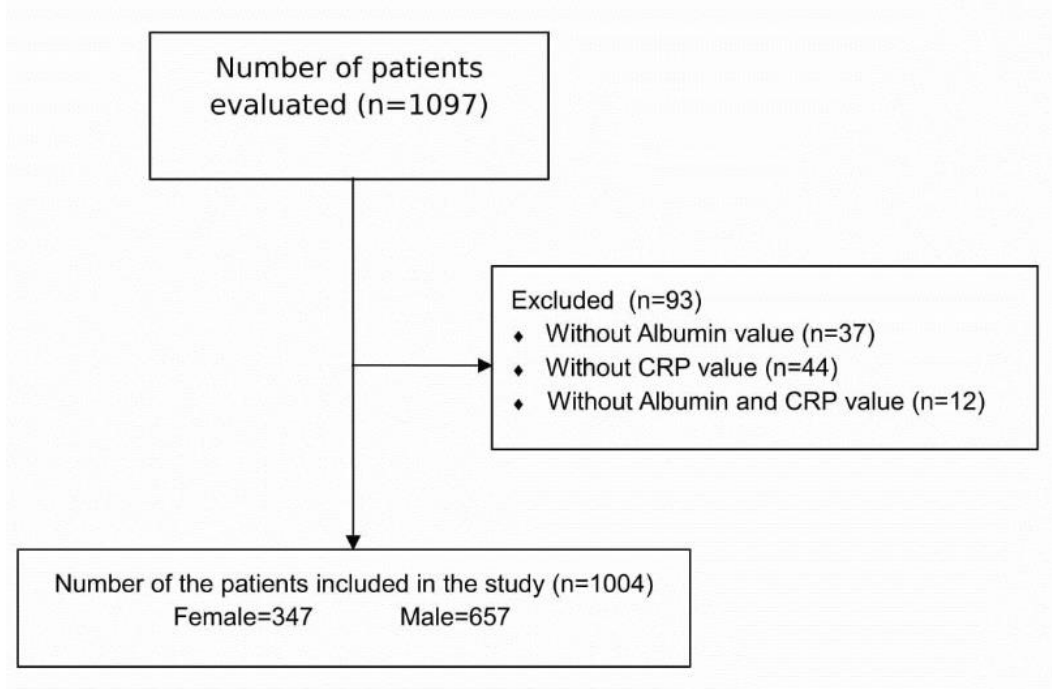

Figure S1. Inclusion and exclusion criteria.

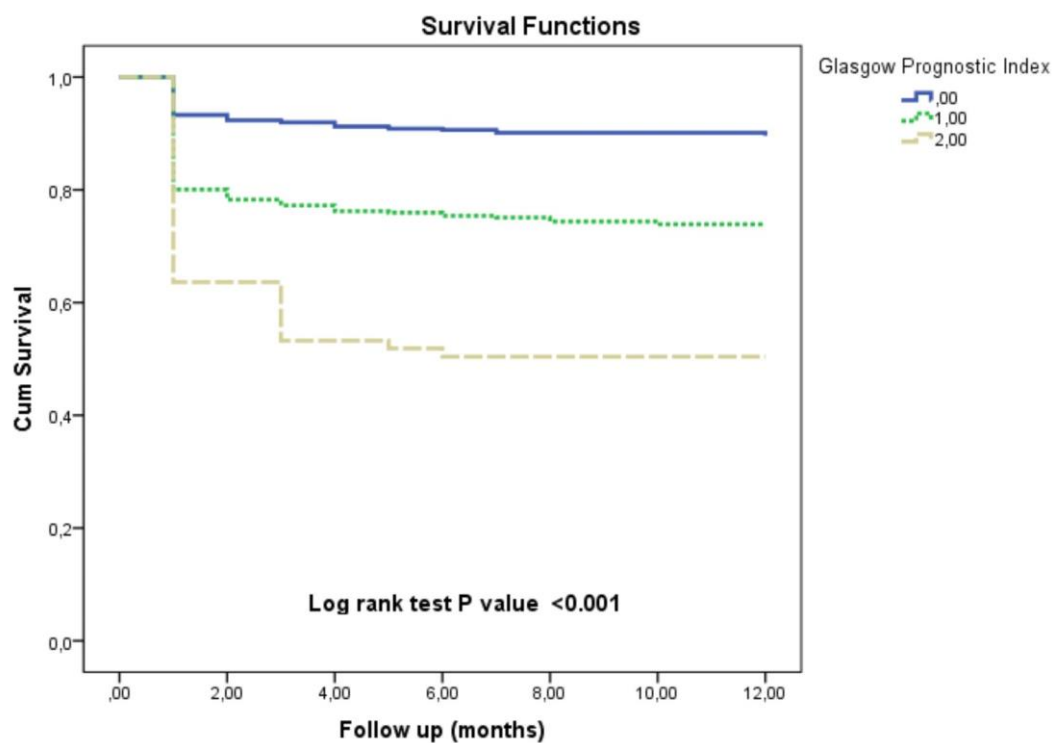

Figure S2. Kaplan-Meier survival analysis.

Table S1. Relationships between clinical characteristics and the GPS in patients followed in intensive care unit.

| Baseline characteristics | GPS = 0 (n = 536)          | GPS = 1 (n = 391)        | GPS = 2 (n = 77)         | P      |
|--------------------------|----------------------------|--------------------------|--------------------------|--------|
| Age, y                   | 62.7 ± 13.6 <sup>a,b</sup> | 67.9 ± 13.5 <sup>a</sup> | 69.9 ± 12.9 <sup>b</sup> | <0.001 |
| Age, median and min-max  | 63 (18–91) <sup>a,b</sup>  | 69 (20–94) <sup>a</sup>  | 72 (21–92) <sup>b</sup>  | <0.001 |

|                                            |                              |                              |                              |        |
|--------------------------------------------|------------------------------|------------------------------|------------------------------|--------|
| Age, males                                 | 60.7 ± 13.0 <sup>a,b</sup>   | 65.3 ± 13.2 <sup>a</sup>     | 66.8 ± 13.6 <sup>b</sup>     | <0.001 |
| Age, females                               | 67.5 ± 13.6 <sup>a,b</sup>   | 71.6 ± 13.0 <sup>a,c</sup>   | 76.5 ± 8.1 <sup>b,c</sup>    | <0.001 |
| Males                                      | 377 (70.3) <sup>a</sup>      | 227 (58.1) <sup>a,c</sup>    | 53 (68.8) <sup>c</sup>       | <0.001 |
| Females                                    | 159 (29.7) <sup>a</sup>      | 164 (41.9) <sup>a,c</sup>    | 24 (31.2) <sup>c</sup>       | <0.001 |
| Body mass index, kg/cm <sup>2</sup>        | 27.5 ± 3.9                   | 27.4 ± 3.4                   | 26.7 ± 2.3                   | 0.641  |
| Smoking                                    | 276 (51.5) <sup>a,b</sup>    | 156 (39.9) <sup>a</sup>      | 27 (35.1) <sup>b</sup>       | <0.001 |
| Hypertension                               | 328 (61.2)                   | 261 (66.8)                   | 55 (71.4)                    | 0.084  |
| Diabetes mellitus                          | 158 (29.5) <sup>b</sup>      | 142 (36.3) <sup>c</sup>      | 35 (45.5) <sup>b,c</sup>     | 0.006  |
| Dyslipidemia                               | 67 (12.5)                    | 40 (10.2)                    | 3 (3.9)                      | 0.065  |
| Coronary artery disease                    | 189 (35.3)                   | 146 (37.3)                   | 29 (37.7)                    | 0.781  |
| Heart failure                              | 66 (12.3) <sup>a,b</sup>     | 83 (21.2) <sup>a</sup>       | 15 (19.5) <sup>b</sup>       | 0.001  |
| Left ventricular ejection fraction, %      | 51.0 ± 10.9 <sup>a</sup>     | 47.7 ± 11.1 <sup>a</sup>     | 48.7 ± 10.8                  | <0.001 |
| Cerebrovascular accident                   | 32 (6.0)                     | 35 (9.0)                     | 9 (11.7)                     | 0.087  |
| Peripheral arterial disease                | 13 (2.4)                     | 11 (2.8)                     | 4 (5.2)                      | 0.386  |
| Chronic kidney disease                     | 53 (9.9) <sup>a</sup>        | 63 (16.1) <sup>a,c</sup>     | 8 (10.4) <sup>c</sup>        | 0.015  |
| Chronic lung disease                       | 34 (6.3) <sup>b</sup>        | 41 (10.5)                    | 10 (13.0) <sup>b</sup>       | 0.027  |
| Dementia                                   | 9 (1.7)                      | 5 (1.3)                      | 2 (2.6)                      | 0.682  |
| Atrial fibrillation                        | 63 (11.8) <sup>a,b</sup>     | 80 (20.5) <sup>a</sup>       | 18 (23.4) <sup>b</sup>       | <0.001 |
| Systolic blood pressure, mmHg              | 120.5 ± 19.0                 | 121.3 ± 20.1                 | 117.1 ± 20.3                 | 0.254  |
| Diastolic blood pressure, mmHg             | 74.1 ± 27.0                  | 71.1 ± 11.9                  | 70.6 ± 13.3                  | 0.101  |
| ICCU LOS                                   | 3.6 ± 4.5                    | 5.3 ± 4.8                    | 5.2 ± 5.4                    | <0.001 |
| Total LOS                                  | 7.6 ± 7.3                    | 10.9 ± 8.5                   | 11.3 ± 9.4                   | <0.001 |
| <b>Laboratory analysis</b>                 |                              |                              |                              |        |
| White blood cell count, 10 <sup>9</sup> /L | 10.6 ± 3.9 <sup>b</sup>      | 11.0 ± 4.5 <sup>c</sup>      | 12.6 ± 5.7 <sup>b,c</sup>    | 0.001  |
| Neutrophil count, 10 <sup>9</sup> /L       | 7.5 ± 4.5 <sup>a,b</sup>     | 8.2 ± 4.3 <sup>a,c</sup>     | 10.8 ± 6.0 <sup>b,c</sup>    | <0.001 |
| Hemoglobin, g/dL                           | 13.6 ± 1.9 <sup>a,b</sup>    | 12.2 ± 2.2 <sup>a,c</sup>    | 11.1 ± 2.0 <sup>b,c</sup>    | <0.001 |
| Glucose, mg/dL                             | 149.7 ± 73.8 <sup>a</sup>    | 176.9 ± 132.6 <sup>a</sup>   | 175 ± 92.7                   | 0.025  |
| Glomerular filtration rate, mL/min         | 90.3 ± 58.4 <sup>a</sup>     | 74.0 ± 34.4 <sup>a</sup>     | 76.6 ± 44.1                  | 0.001  |
| Creatinine, mg/dL                          | 1.04 ± 0.79 <sup>a</sup>     | 1.26 ± 1.00 <sup>a</sup>     | 1.25 ± 0.76                  | <0.001 |
| Triglycerides, mg/dL                       | 125 (87–182)                 | 107 (79–154)                 | 125 (84–187)                 | 0.141  |
| Total cholesterol, mg/dL                   | 182 (150–218) <sup>a,b</sup> | 164 (134–198) <sup>a,c</sup> | 136 (116–168) <sup>b,c</sup> | <0.001 |
| LDL cholesterol, mg/dL                     | 118 (94–143) <sup>a,b</sup>  | 104 (84–130) <sup>a,c</sup>  | 88 (68–110) <sup>b,c</sup>   | <0.001 |
| NT-pro-BNP, pg/mL                          | 2069 (458–5808)              | 5600 (2415–11236)            | 5361 (1540–11670)            | 0.569  |
| Total bilirubin, mg/dL                     | 0.50 (0.3–0.85)              | 0.60 (0.40–1.00)             | 0.75 (0.45–1.20)             | 0.170  |
| Alanine aminotransferase, IU/L             | 20 (15–30) <sup>b</sup>      | 22 (13–33)                   | 24 (16–46) <sup>b</sup>      | 0.041  |
| Aspartate aminotransferase, IU/L           | 32 (23–51) <sup>b</sup>      | 34 (23–62) <sup>c</sup>      | 46 (26–104) <sup>b,c</sup>   | 0.012  |
| <b>In-hospital medication/treatment</b>    |                              |                              |                              |        |
| Aspirin                                    | 444 (82.8)                   | 292 (74.7)                   | 56 (72.7)                    | 0.004  |
| P2Y12 antagonists                          | 399 (74.4) <sup>a,b</sup>    | 252 (64.5) <sup>a</sup>      | 46 (59.7) <sup>b</sup>       | 0.001  |
| Beta-blockers                              | 382 (71.3)                   | 260 (66.5)                   | 49 (63.6)                    | 0.179  |
| CCB (dihydropyridine)                      | 30 (5.6)                     | 31 (7.9)                     | 3 (3.9)                      | 0.233  |
| CCB (non-dihydropyridine)                  | 11 (2.1)                     | 10 (2.6)                     | 0 (0.0)                      | 0.357  |
| ACEI or ARB                                | 296 (55.2)                   | 187 (47.8)                   | 37 (48.1)                    | 0.066  |
| Oral anticoagulants                        | 21 (3.9)                     | 28 (7.2)                     | 4 (5.2)                      | 0.093  |
| Heparin (all class)                        | 454 (84.7)                   | 312 (79.8)                   | 62 (80.5)                    | 0.136  |
| Statins                                    | 380 (70.9) <sup>a,b</sup>    | 235 (60.1) <sup>a</sup>      | 46 (59.7) <sup>b</sup>       | 0.001  |
| Diuretics                                  | 85 (15.9) <sup>a</sup>       | 104 (26.6) <sup>a</sup>      | 17 (22.1)                    | <0.001 |
| Spironolactone                             | 37 (6.9) <sup>a,b</sup>      | 54 (13.8) <sup>a</sup>       | 13 (16.9) <sup>b</sup>       | <0.001 |
| Nitrates                                   | 111 (20.7)                   | 84 (21.5)                    | 19 (24.7)                    | 0.725  |
| Inotropic agents                           | 35 (6.5) <sup>a,b</sup>      | 72 (18.4) <sup>a,c</sup>     | 23 (29.9) <sup>b,c</sup>     | <0.001 |
| Therapeutic hypothermia                    | 5 (0.9)                      | 9 (2.3)                      | 1 (1.3)                      | 0.235  |
| Total parenteral nutrition                 | 3 (0.6) <sup>a,b</sup>       | 17 (4.4) <sup>a</sup>        | 3 (3.9) <sup>b</sup>         | <0.001 |
| Antimicrobial agents                       | 100 (18.7) <sup>a,b</sup>    | 131 (33.5) <sup>a,c</sup>    | 46 (59.7) <sup>b,c</sup>     | <0.001 |

Abbreviations: GPS, Glasgow prognostic score; LDL, low density lipoprotein; NT-pro-BNP, N-terminal pro B-type natriuretic peptide; CCB, calcium channel blocker; ACEI, angiotensin converting enzyme inhibitor; ARB, angiotensin receptor blocker. Symbols (<sup>a,b,c</sup>) indicate post-hoc analysis (Tukey or Bonferoni Corrected Mann-Whitney U Test).

**Table S2.** The distribution of diagnosis of ICCU patients on admission.

| Main Diagnosis                                      | Total        | GPS = 0<br>(n = 536) | GPS = 1<br>(n = 391) | GPS = 2<br>(n = 77) | P     |
|-----------------------------------------------------|--------------|----------------------|----------------------|---------------------|-------|
| Acute coronary syndrome                             | 656 (65.3%)  | 382(71.3%)           | 231(59.1 %)          | 43 (55.8 %)         | 0.001 |
| Acute heart failure                                 | 130 (12.9 %) | 40 (7.5 %)           | 74 (18.9 %)          | 16 (20.8 %)         | 0.001 |
| Atrioventricular block,<br>Ventricular arrhythmia   | 45 (4.5 %)   | 25 (4.7 %)           | 18 (4.6%)            | 2 (2.6 %)           | 0.7   |
| Atrial fibrillation with rapid ventricular response | 31 (3.1 %)   | 18 (3.4 %)           | 10 (2.6 %)           | 3 (3.9%)            | 0.06  |
| Hypertensive emergency                              | 32 (3.2 %)   | 17 (3.2%)            | 12 (3.1 %)           | 3 (3.9 %)           | 0.9   |
| Severely valvular disease                           | 19 (1.9 %)   | 6 (1.1 %)            | 11 (2.8 %)           | 2 (2.6 %)           | 0.1   |
| Cardiopulmonary arrest                              | 16 (1.6 %)   | 8 (1.5 %)            | 7 (1.8 %)            | 1 (1.3%)            | 0.9   |
| Pericardial tamponade                               | 20 (2 %)     | 6 (1.1 %)            | 10 (2.6 %)           | 4(5.2%)             | 0.34  |
| Myocarditis                                         | 14 (1.4 %)   | 8 (1.5 %)            | 8 (2.0 %)            | 2 (2.6%)            | 0.07  |
| Others                                              | 11 (1.1 %)   | 7 (1.3 %)            | 3 (0.8%)             | 1 (1.3%)            | 0.7   |
|                                                     | 28 (2.8 %)   | 18 (3.4 %)           | 9 (2.3%)             | 1 (1.3%)            | 0.4   |

**Table S3.** Relationships between clinical events and the GPS in patients followed in intensive care unit and followup period.

| Events                           | GPS = 0 (n = 536)        | GPS = 1 (n = 391)         | GPS = 2 (n = 77)         | P      |
|----------------------------------|--------------------------|---------------------------|--------------------------|--------|
| Cardio-pulmonary arrest          | 24 (4.5) <sup>a,b</sup>  | 66 (16.9) <sup>a,c</sup>  | 20 (26.0) <sup>b,c</sup> | <0.001 |
| Ventricular arrhythmia           | 17 (3.2)                 | 19 (4.9)                  | 5 (6.5)                  | 0.237  |
| Cerebrovascular accident         | 2 (0.4)                  | 2 (0.5)                   | 0 (0.0)                  | 0.801  |
| Acute kidney injury              | 26 (4.9) <sup>a,b</sup>  | 45 (11.5) <sup>a</sup>    | 7 (9.1) <sup>b</sup>     | 0.001  |
| Death (In-hospital)              | 22 (4.1) <sup>a,b</sup>  | 64 (16.4) <sup>a,c</sup>  | 23 (29.9) <sup>b,c</sup> | <0.001 |
| Death (Follow-up)                | 31 (5.8) <sup>a,b</sup>  | 36 (9.2) <sup>a,c</sup>   | 15 (19.5) <sup>b,c</sup> | <0.001 |
| Rehospitalisation                | 83 (16.1) <sup>a,b</sup> | 79 (24.3) <sup>a,c</sup>  | 17 (31.5) <sup>b,c</sup> | 0.002  |
| Reinfarct                        | 19 (3.7)                 | 12 (3.7)                  | 2 (3.7)                  | 1      |
| Total death (12-months)          | 53 (9.9) <sup>a,b</sup>  | 100 (25.6) <sup>a,c</sup> | 38 (49.4) <sup>b,c</sup> | <0.001 |
| Total death, males (12-months)   | 34 (6.3) <sup>a,b</sup>  | 48 (12.2) <sup>a,c</sup>  | 28 (36.3) <sup>b,c</sup> | <0.001 |
| Total death, females (12-months) | 19 (3.6) <sup>a,b</sup>  | 52 (13.4) <sup>a,c</sup>  | 10 (16.1) <sup>b,c</sup> | <0.001 |
| Total death <60 y (12-months)    | 9 (1.6) <sup>b</sup>     | 15 (3.8)                  | 4 (5.1) <sup>c</sup>     | <0.001 |
| Total death ≥60 y (12-months)    | 44 (2.0) <sup>a,b</sup>  | 85 (9.6) <sup>a,c</sup>   | 34 (44.3) <sup>b,c</sup> | <0.001 |

Symbols (a,b,c) indicate post-hoc analysis.

**Table S4.** Logistic regression of in-hospital mortality for patients followed in intensive care unit.

|                                    | Univariate analysis |            |        | Multivariate analysis |            |        |
|------------------------------------|---------------------|------------|--------|-----------------------|------------|--------|
|                                    | OR                  | 95% CI     | P      | OR                    | 95% CI     | P      |
| GPS (1 vs. 0)                      | 4.57                | 2.76–7.56  | <0.001 | 4.52                  | 1.20–16.91 | 0.025  |
| GPS (2 vs. 0)                      | 9.95                | 5.20–19.02 | <0.001 | 7.01                  | 1.39–35.15 | 0.018  |
| Age                                | 1.05                | 1.03–1.07  | <0.001 |                       |            |        |
| Hypertension                       | 0.61                | 0.40–0.91  | 0.016  |                       |            |        |
| Heart failure                      | 1.82                | 1.13–2.91  | 0.013  |                       |            |        |
| Chronic kidney disease             | 1.83                | 1.09–3.08  | 0.003  |                       |            |        |
| Atrial fibrillation                | 2.21                | 1.39–3.50  | 0.001  |                       |            |        |
| Hemoglobin                         | 0.83                | 0.76–0.91  | <0.001 |                       |            |        |
| White blood cell count             | 1.09                | 1.05–1.13  | <0.001 |                       |            |        |
| Creatinine                         | 1.43                | 1.21–1.70  | <0.001 |                       |            |        |
| Total cholesterol                  | 0.98                | 0.98–0.99  | <0.001 |                       |            |        |
| NT-pro-BNP                         | 1.06                | 1.02–1.08  | <0.001 | 1.03                  | 1.02–1.06  | <0.001 |
| Total bilirubin                    | 1.30                | 1.01–1.69  | 0.042  |                       |            |        |
| Alanine aminotransferase           | 1.00                | 1.00–1.00  | <0.001 |                       |            |        |
| Aspartate aminotransferase         | 1.00                | 1.00–1.00  | <0.001 |                       |            |        |
| Left ventricular ejection fraction | 0.95                | 0.93–0.96  | <0.001 |                       |            |        |
